# Supplementary material for: Multicolor vision perception of flexible optoelectronic synapse with high sensitivity for skin sunburn warning
Source: Royal Society of Chemistry journal article supplement (doi:10.1039/d3mh02154h), 2024-01-01
Supplement: d3mh02154h1.pdf [file d3mh02154h1.pdf]

## Electronic Supplementary Information

### **Multicolor vision perception of flexible optoelectronic synapse with high-sensitivity for skin sunburn warning**

Yaqian Yang,<sup>1,2</sup> Ying Li,<sup>\*1</sup> Di Chen,<sup>1,2</sup> Guozhen Shen<sup>\*1</sup>

Dr. Yaqian Yang, Dr. Ying Li, Prof. Di Chen, Prof. Guozhen Shen  
School of Integrated Circuits and Electronics  
Beijing Institute of Technology  
Beijing 100081, China  
E-mail: liying0326@bit.edu.cn; gzshen@bit.edu.cn

Dr. Yaqian Yang, Prof. Di Chen  
School of Mathematics and Physics  
University of Science and Technology Beijing  
Beijing 100083, China.

Keywords: lead-free halide perovskite, flexible artificial synapse, multicolor vision perception, high-sensitivity, skin sunburn warning

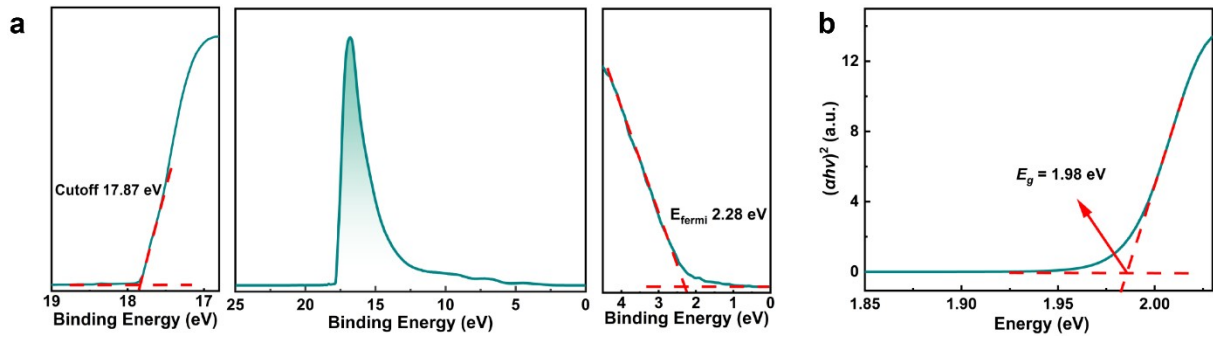

**Fig. S1** (a) UPS data of the PEA<sub>2</sub>SnI<sub>4</sub> films. (b) Tauc plot of the PEA<sub>2</sub>SnI<sub>4</sub> film.

The work function was calculated using the following formulas:<sup>1</sup>

$$E_F = -21.22 + E_{\text{cutoff}} \quad (1)$$

in which  $E_{\text{cutoff}}$  is the binding energy of the second-order cutoff in the spectrum. It can be calculated as  $-3.35$  eV.  $E_{\text{Fermi}}$  is the difference between the Fermi energy and the  $E_{\text{VBM}}$ . Thus, the calculated value of  $E_{\text{VBM}}$  is  $5.63$  eV. The Tauc plot reveals that the direct band gap ( $E_g$ ) of the Cs<sub>3</sub>Bi<sub>2</sub>Br<sub>9</sub> film to be  $1.98$  eV. Therefore, on the basis of  $E_{\text{VBM}}$  and  $E_g$  ( $E_g = E_{\text{CBM}} - E_{\text{VBM}}$ ), the conduction band ( $E_{\text{CBM}}$ ) can be calculated as  $-3.65$  eV.

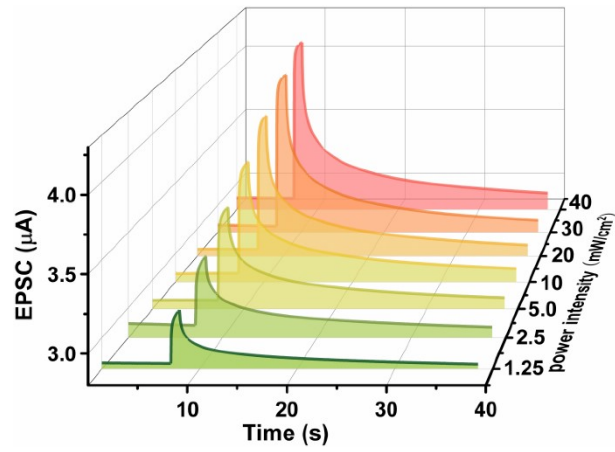

**Fig. S2** EPSC behavior triggered by illumination for 1 s at different optical power densities (520 nm, 3 V, pulse width of 1 s).

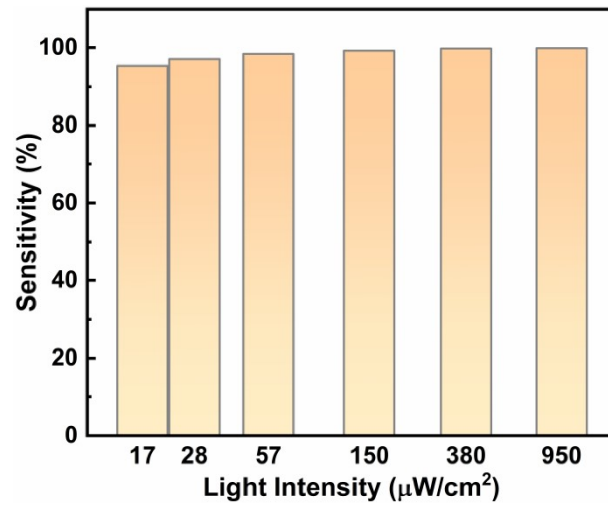

**Fig. S3** *S* versus light intensity of PEA<sub>2</sub>SnI<sub>4</sub>/ZnO devices under weak light illumination.

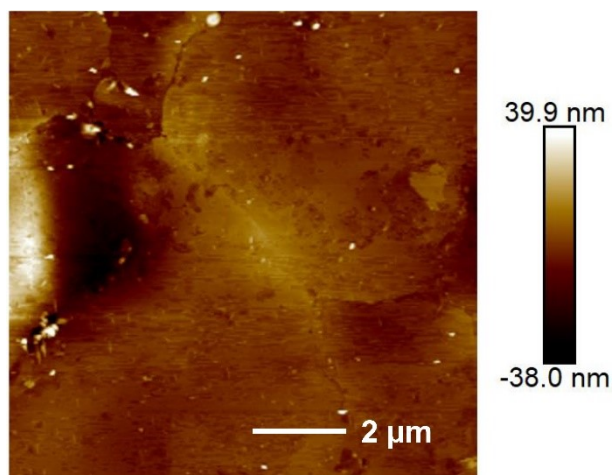

**Fig. S4** AFM images of PEA<sub>2</sub>SnI<sub>4</sub> film.

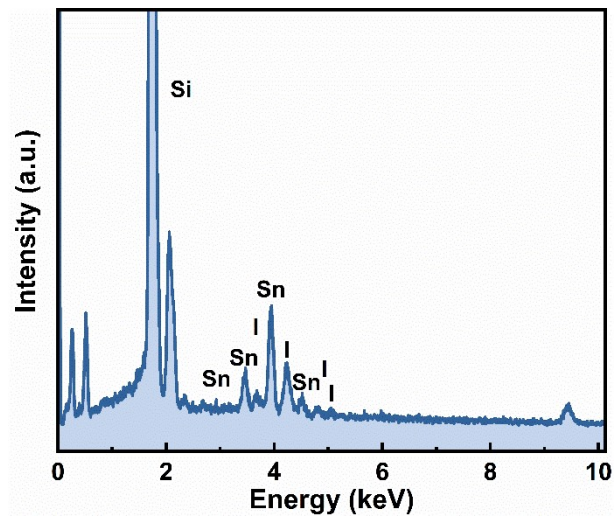

**Fig. S5** EDS spectra of the  $\text{PEA}_2\text{SnI}_4$  films.

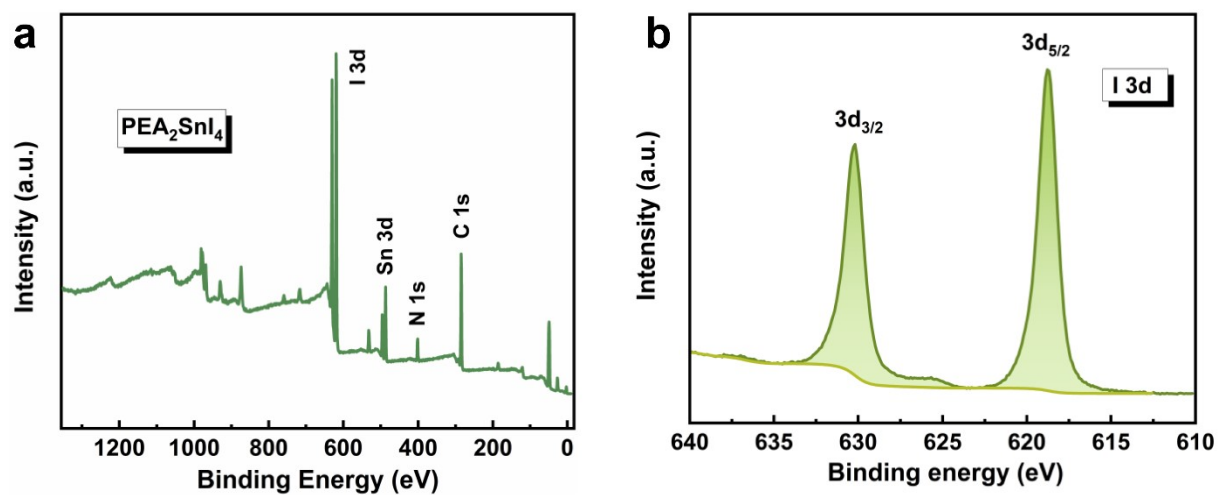

**Fig. S6** (a) XPS spectra of PEA<sub>2</sub>SnI<sub>4</sub> films and the high-resolution spectra of (b) I 3d.

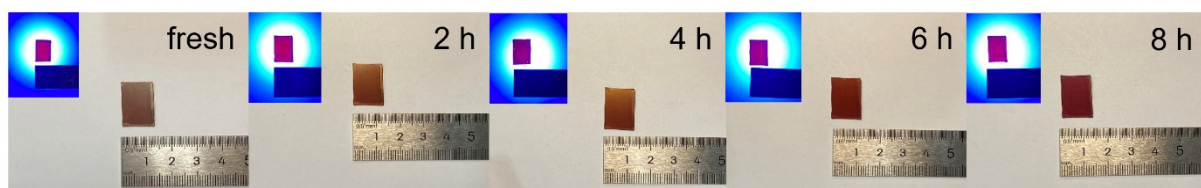

**Fig. S7** The optical photographs of the PEA<sub>2</sub>SnI<sub>4</sub> films after different storage periods under air conditions.



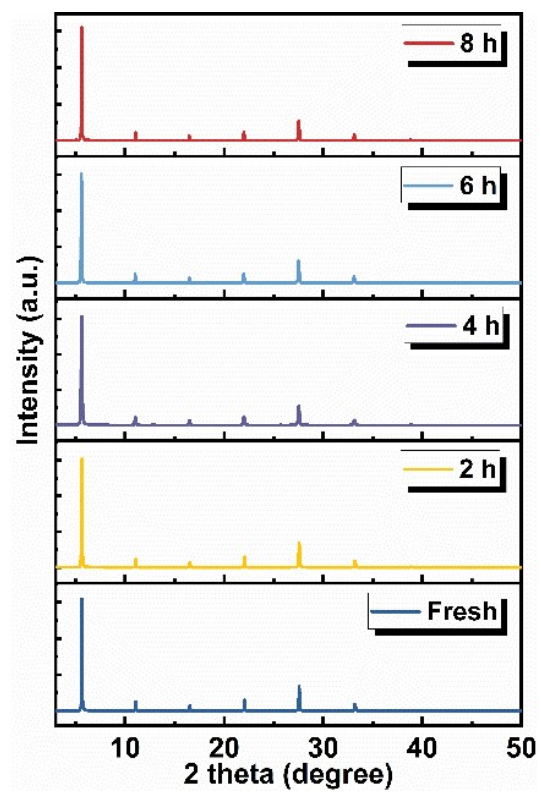

**Fig. S8** XRD measurements of the PEA<sub>2</sub>SnI<sub>4</sub> films after different storage periods under air conditions.

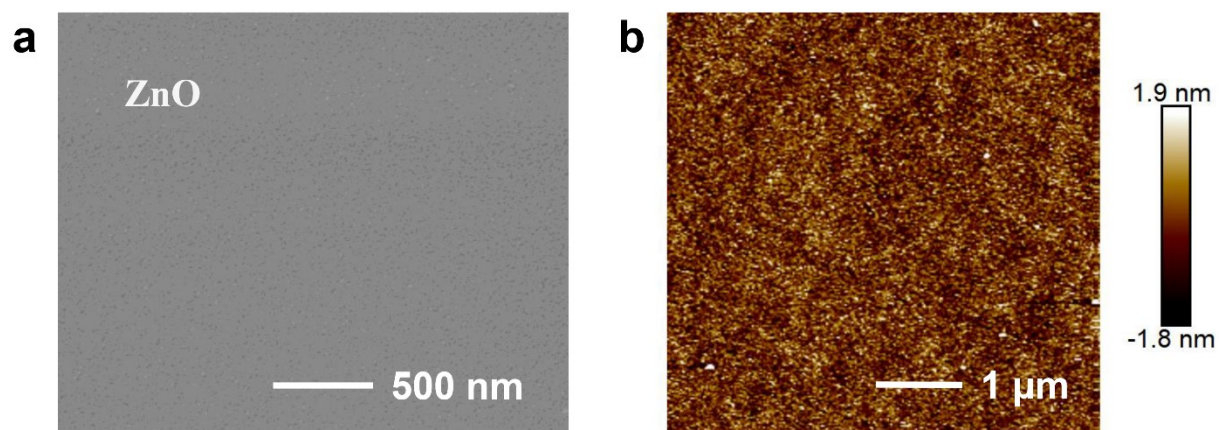

**Fig. S9** (a) Top-view SEM image of ZnO film and (b) corresponding AFM images.

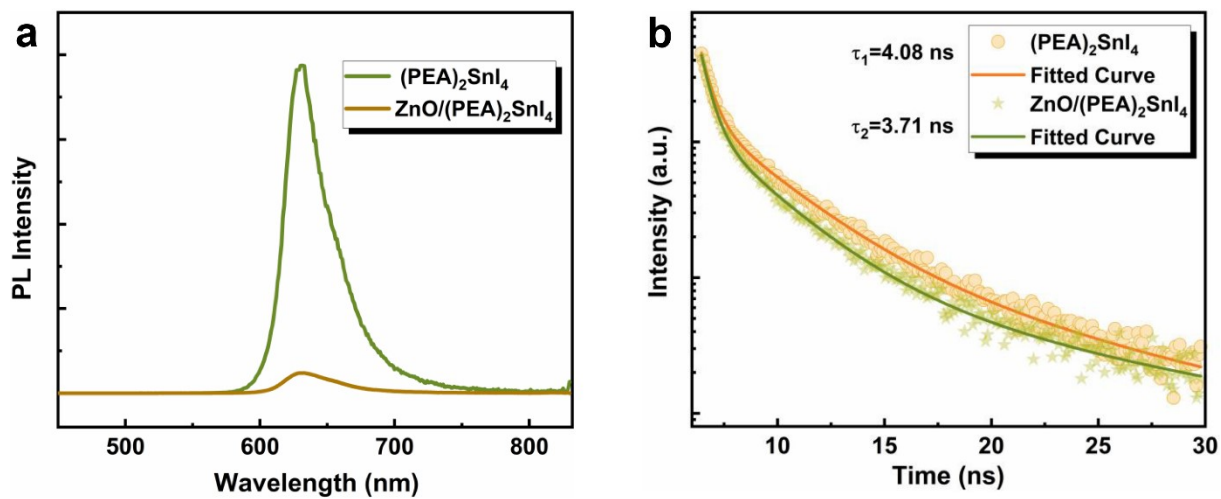

**Fig. S10** (a) PL spectra and (b) the time-resolved PL decay and fitting curves of  $(\text{PEA})_2\text{SnI}_4$  and the  $(\text{PEA})_2\text{SnI}_4/\text{ZnO}$  films.

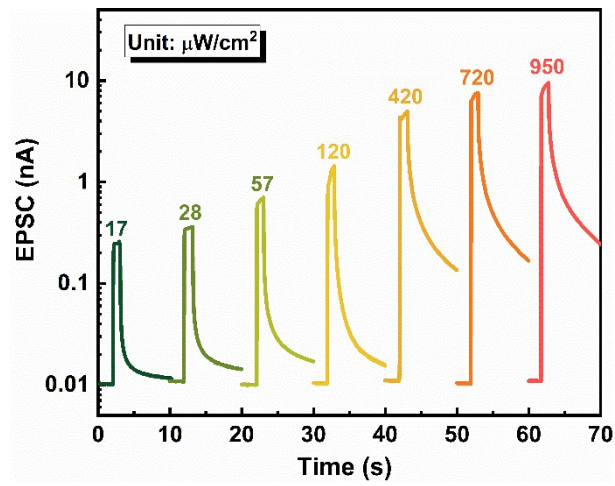

**Fig. S11** EPSC behavior triggered by illumination for 1 s at weak optical power densities (520 nm, 0 V, pulse width of 1 s).

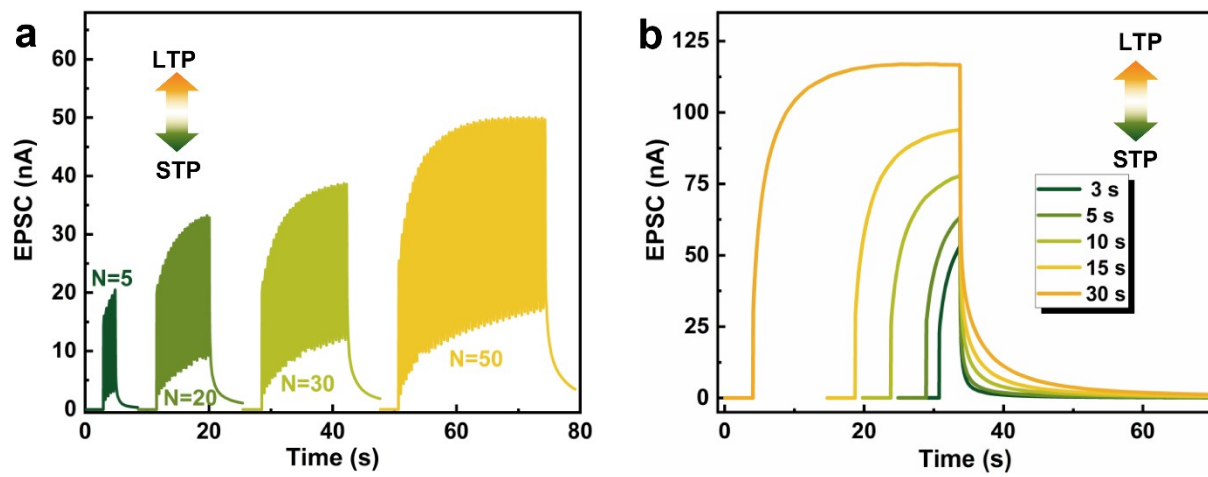

**Fig. S12** The EPSC behavior of the device measured at (a) different pulse numbers and (b) different illumination time.

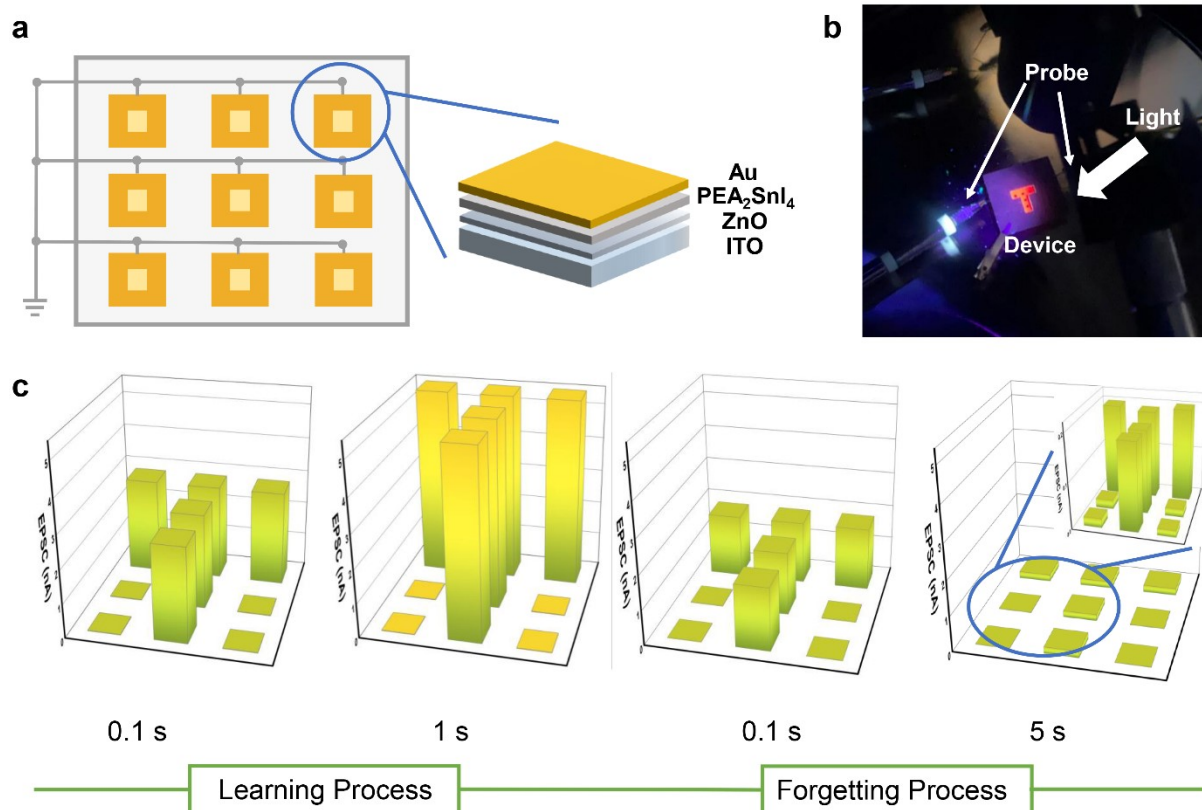

**Fig. S13** (a) Schematic diagram of a 3×3 synaptic device arrays. (b) Optical photographs of the test. (c) Visualization of the learning and forgetting curve of the letter “T” (520 nm, 420 μW cm<sup>-2</sup>).

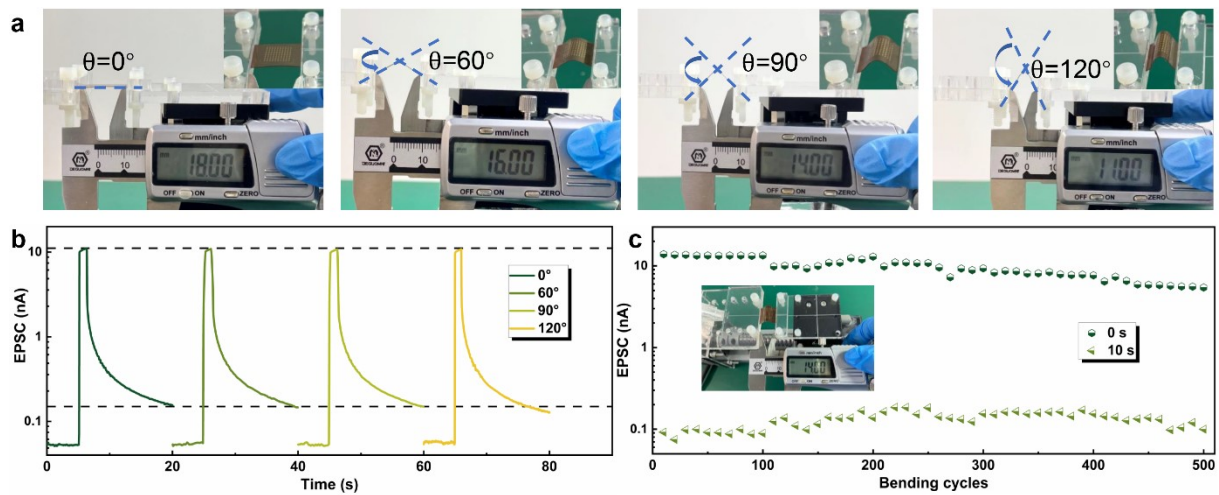

**Fig. S14** (a) Optical images at different bending angles and (b) corresponding EPSC after 1 s of illumination. (c) Changes in EPSC values when light is withdrawn for 0 and 10 seconds (exposure for one second under  $520\text{ nm}, 1.25\text{ mW cm}^{-2}$ ). The bending cycles are 500 cycles with an interval of 10 cycles.

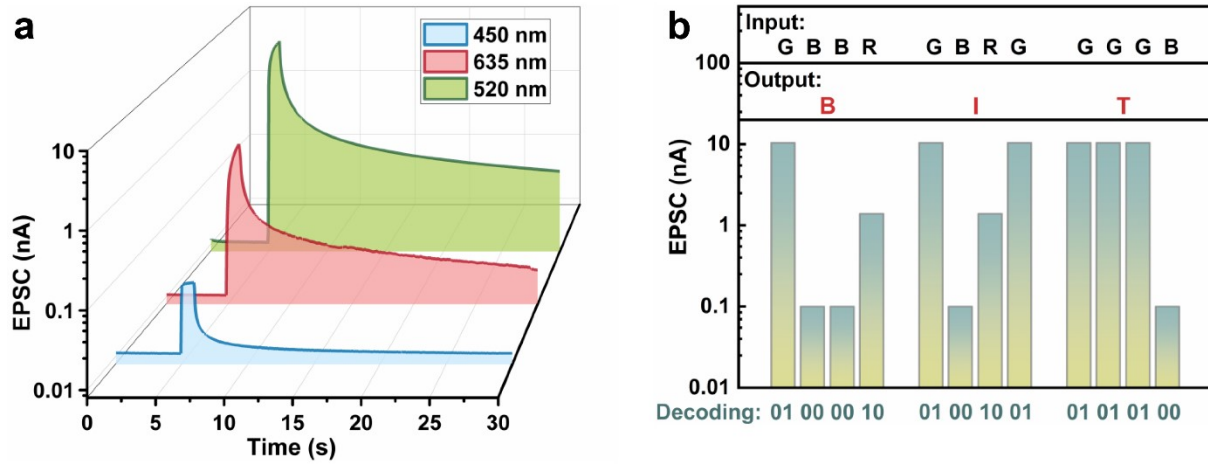

**Fig. S15** (a) EPSC behavior triggered by light of different wavelength with the same pulse width (1 s, 450 nm  $420 \text{ uW cm}^{-2}$ , 520 nm  $1.25 \text{ mW cm}^{-2}$ , 635 nm,  $420 \text{ uW cm}^{-2}$ ). (b) The decode results of the photoelectronic synapse to the American Standard Code for Information Interchange (ASCII).



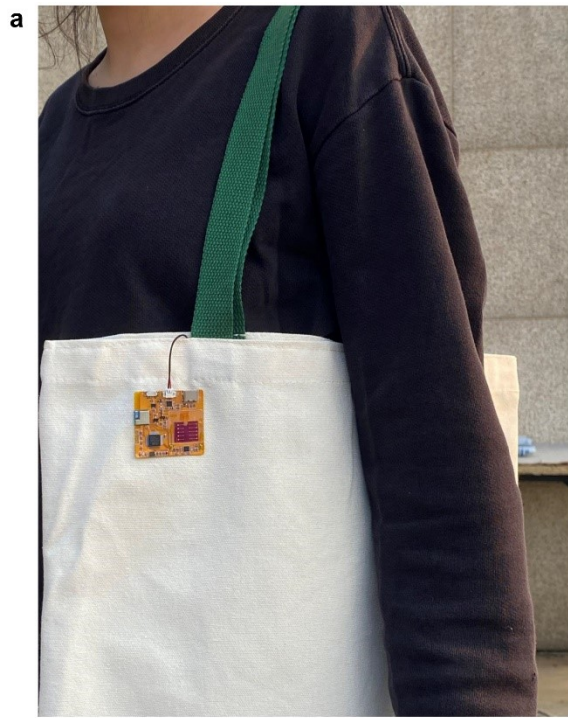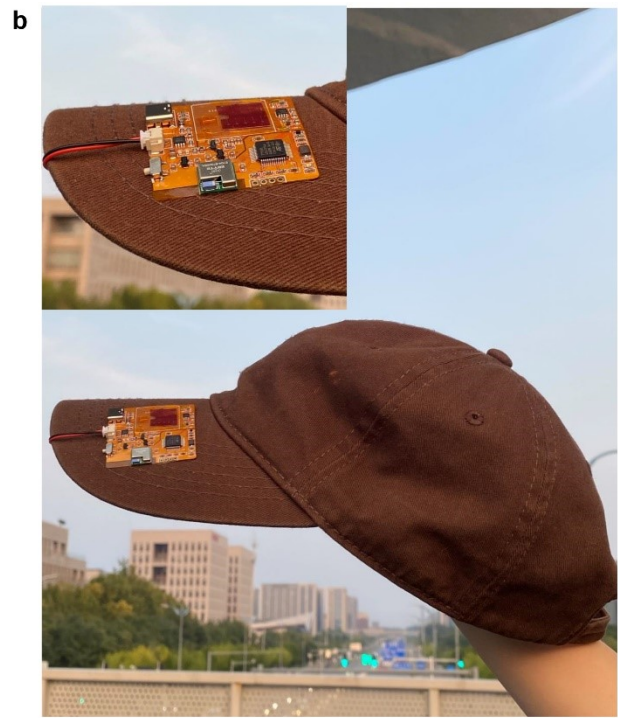

**Fig. S16** Photographs for optical displays of the designed flexible circuit board on a (a) canvas bag and (b) hat.

**Table S1** Comparisons between previous low-energy synaptic devices and this work.

| Device Structure                          | P ( $\mu\text{W cm}^{-2}$ ) | $\lambda$ (nm) | Opt. Volt (V) | $\Delta E$ (J) | S (%)        | Ref              |
|-------------------------------------------|-----------------------------|----------------|---------------|----------------|--------------|------------------|
| <b>PEA<sub>2</sub>SnI<sub>4</sub>/ZnO</b> | <b>17</b>                   | <b>520</b>     | <b>0</b>      | <b>0</b>       | <b>95.38</b> | <b>This work</b> |
| Al <sub>2</sub> O <sub>3</sub> /CdS       | 2.48×10 <sup>3</sup>        | 365            | —             | 0              | 20.00        | [2]              |
| DPPDTT/CsPbBr <sub>3</sub> QD             | 50                          | 450            | -0.5 m        | 25 f           | 20           | [3]              |
| BP flakes                                 | 2×10 <sup>3</sup>           | 280            | 50 m          | 5.75 n         | 26.09        | [4]              |
| 2DP/PMMA/pentacene                        | 690                         | 400            | 0.1           | 0.29 p         | 33.3         | [5]              |
| ReS <sub>2</sub> /h-BN/monographene       | 0.11 nW/ $\mu\text{m}^2$    | 532            | 0.1           | 0.06 n         | 41.67        | [6]              |
| Dif-TES-ADT                               | —                           | —              | 0.1           | 0.07~34 f      | 50           | [7]              |
| ZnO/MoO <sub>3</sub> /Mo                  | 8                           | 390            | —             | 37 p           | 66.67        | [8]              |
| CNT/CsPbBr <sub>3</sub> QD                | 48                          | 516            | 5             | 1.7 n          | 70.59        | [9]              |
| Ag/BiOI/Pt                                | —                           | 400            | 0.01          | 100 f          | 75           | [10]             |
| CsPbBr <sub>3</sub> /PDPP4T               | 650                         | 450            | 10 $\mu$      | 1.3 f          | 98.33        | [11]             |
| CsBi <sub>3</sub> I <sub>10</sub> /PDPP4T | 320                         | 430            | -1            | 1.25 n         | 99.2         | [12]             |

## References

- 1 Y. J. Liu, Y. X. Gao, J. Y. Zhi, R. Q. Huang, W. J. Li, X. Y. Huang, G. H. Yan, Z. Ji and W. J. Mai, *Nano Res.*, 2022, **15**, 1094.
- 2 X. Han, Y. Zhang, Z. Huo, X. Wang, G. Hu, Z. Xu, H. Lu, Q. Lu, X. Sun, L. Qiu, P. Yan and C. Pan, *Adv. Electron. Mater.*, 2023, **9**, 2201068.
- 3 D. Hao, J. Zhang, S. Dai, J. Zhang and J. Huang, *ACS Appl. Mater. Interfaces*, 2020, **12**, 39487.
- 4 T. Ahmed, M. Tahir, M. X. Low, Y. Ren, S. A. Tawfik, E. L. H. Mayes, S. Kuriakose, S. Nawaz, M. J. S. Spencer, H. Chen, M. Bhaskaran, S. Sriram and S. Walia, *Adv. Mater.*, 2021, **33**, e2004207.
- 5 J. Zhang, Q. Shi, R. Wang, X. Zhang, L. Li, J. Zhang, L. Tian, L. Xiong and J. Huang, *InfoMat*, 2021, **3**, 904.
- 6 Y. Chen, Y. Kang, H. Hao, X. Xie, J. Zeng, T. Xu, C. Li, Y. Tan and L. Fang, *Adv. Funct. Mater.*, 2022, **33**, 2209781.
- 7 J. Shi, J. Jie, W. Deng, G. Luo, X. Fang, Y. Xiao, Y. Zhang, X. Zhang and X. Zhang, *Adv. Mater.*, 2022, **34**, e2200380.
- 8 T. Guo, B. Zhang, X. Wang, Y. Xiao, B. Sun, Y. N. Zhou and Y. A. Wu, *Adv. Funct. Mater.*, 2023, **33**, 2303879.
- 9 Q. B. Zhu, B. Li, D. D. Yang, C. Liu, S. Feng, M. L. Chen, Y. Sun, Y. N. Tian, X. Su, X. M. Wang, S. Qiu, Q. W. Li, X. M. Li, H. B. Zeng, H. M. Cheng and D. M. Sun, *Nat. Commun.*, 2021, **12**, 1798.
- 10 P. Lei, H. Duan, L. Qin, X. Wei, R. Tao, Z. Wang, F. Guo, M. Song, W. Jie and J. Hao, *Adv. Funct. Mater.*, 2022, **32**, 2201276.
- 11 T. Chen, X. Wang, D. Hao, S. Dai, Q. Ou, J. Zhang and J. Huang, *Adv. Optical Mater.*, 2021, **9**, 2002030.
- 12 R. Wang, P. Chen, D. Hao, J. Zhang, Q. Shi, D. Liu, L. Li, L. Xiong, J. Zhou and J. Huang, *ACS Appl. Mater. Interfaces*, 2021, **13**, 43144.
